# Supplementary material for: Enhancing cell adhesion in synthetic hydrogels via physical confinement of peptide-functionalized polymer clusters
Source: Royal Society of Chemistry journal article supplement (doi:10.1039/d4tb00761a), 2024-01-01
Supplement: d4tb00761a1.pdf [file d4tb00761a1.pdf]

# **Enhancing Cell Adhesion in Synthetic Hydrogels via Physical Confinement of Peptide-Functionalized Polymer Clusters**

Shohei Ishikawa<sup>1\*</sup>, Hiroyuki Kamata<sup>1\*</sup>, Takamasa Sakai<sup>1</sup>

[1] Department of Chemistry & Biotechnology, School of Engineering, The University of Tokyo

\*Corresponding Authors:

S.I. ([Ishikawa@gel.t.u-tokyo.ac.jp](mailto:Ishikawa@gel.t.u-tokyo.ac.jp))

H.K. ([hiroyuki-kamata@g.ecc.u-tokyo.ac.jp](mailto:hiroyuki-kamata@g.ecc.u-tokyo.ac.jp))

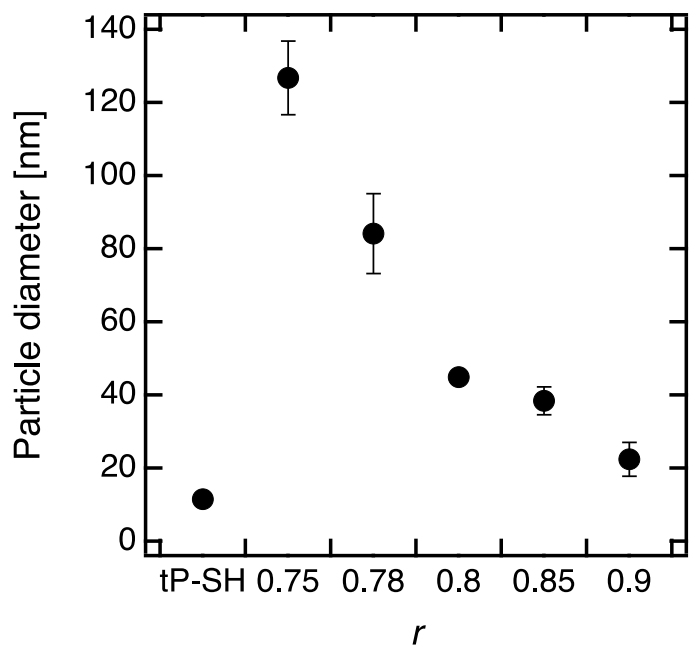

**Figure S1** □ Particle diameter of cP.

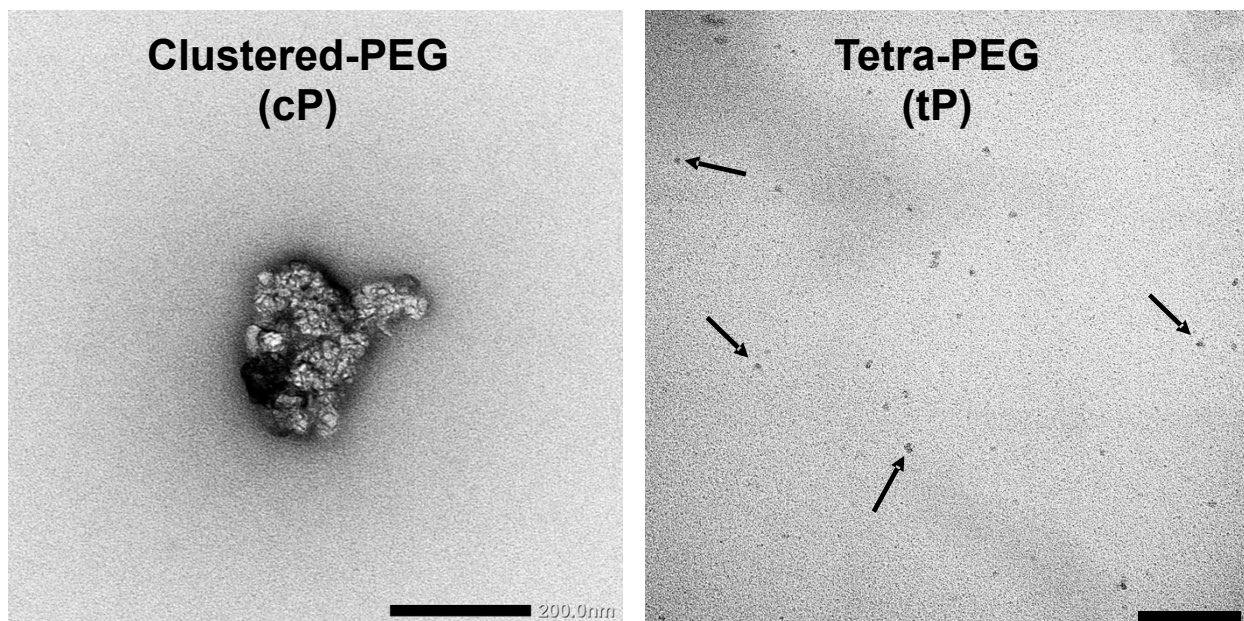

**Figure S2** □ TEM images of cP and tP. Scale bars: 200 nm.

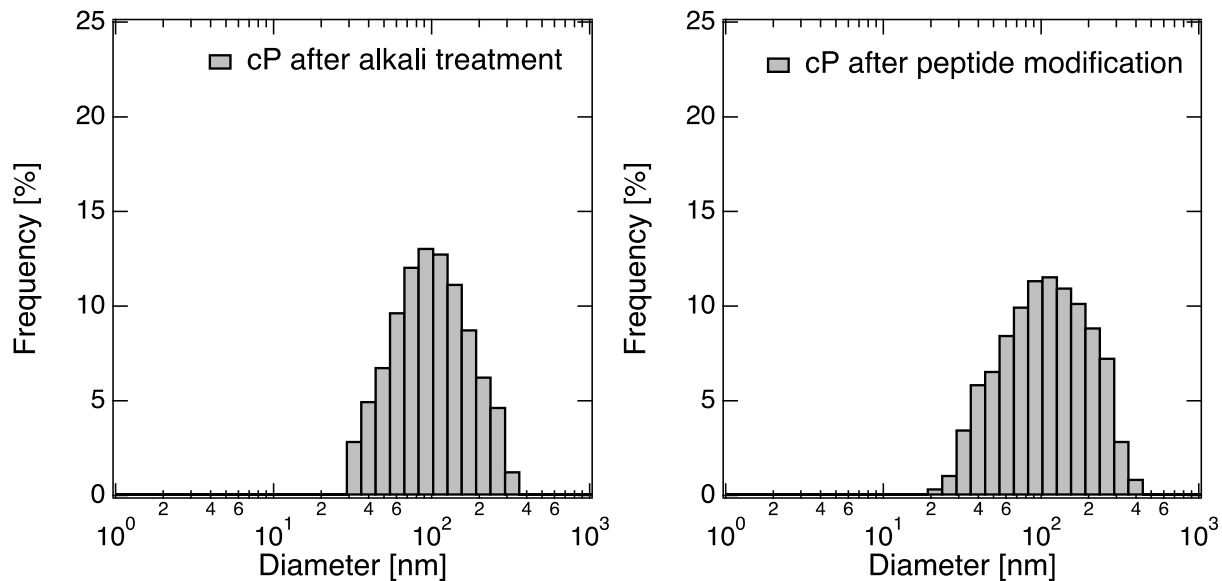

**Figure S3** Size distribution of cP after alkali treatment and peptide modification.

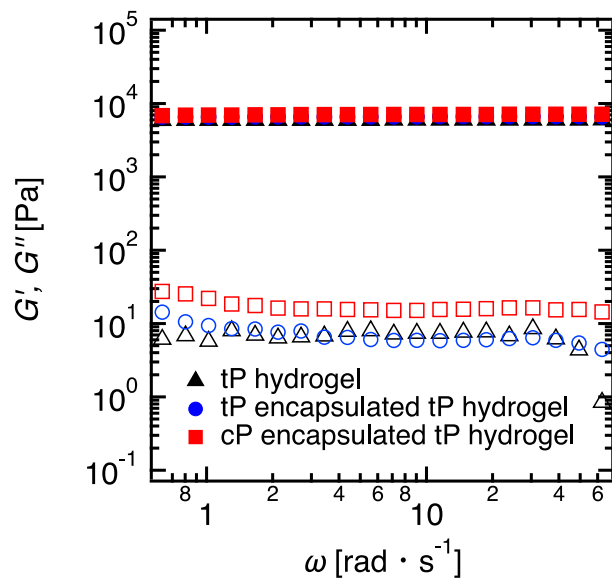

**Figure S4** Mechanical strength of hydrogels. Filled and open plots show storage ( $G'$ ) and loss ( $G''$ ) modulus, respectively.
